# Supplementary material for: PI4K2A deficiency in an intellectual disability, epilepsy, myoclonus, akathisia syndrome
Source: PubMed Central journal article supplement — Ann Clin Transl Neurol. 2018 Oct 24;5(12):1617–21. doi: 10.1002/acn3.677 (PMC6292187; doi:10.1002/acn3.677), 2018-10-24
Supplement: ACN3-5-1617-s001.pdf [file ACN3-5-1617-s001.pdf]

## Supplementary Figure 1: Brain MRI for individual II-8 at infancy

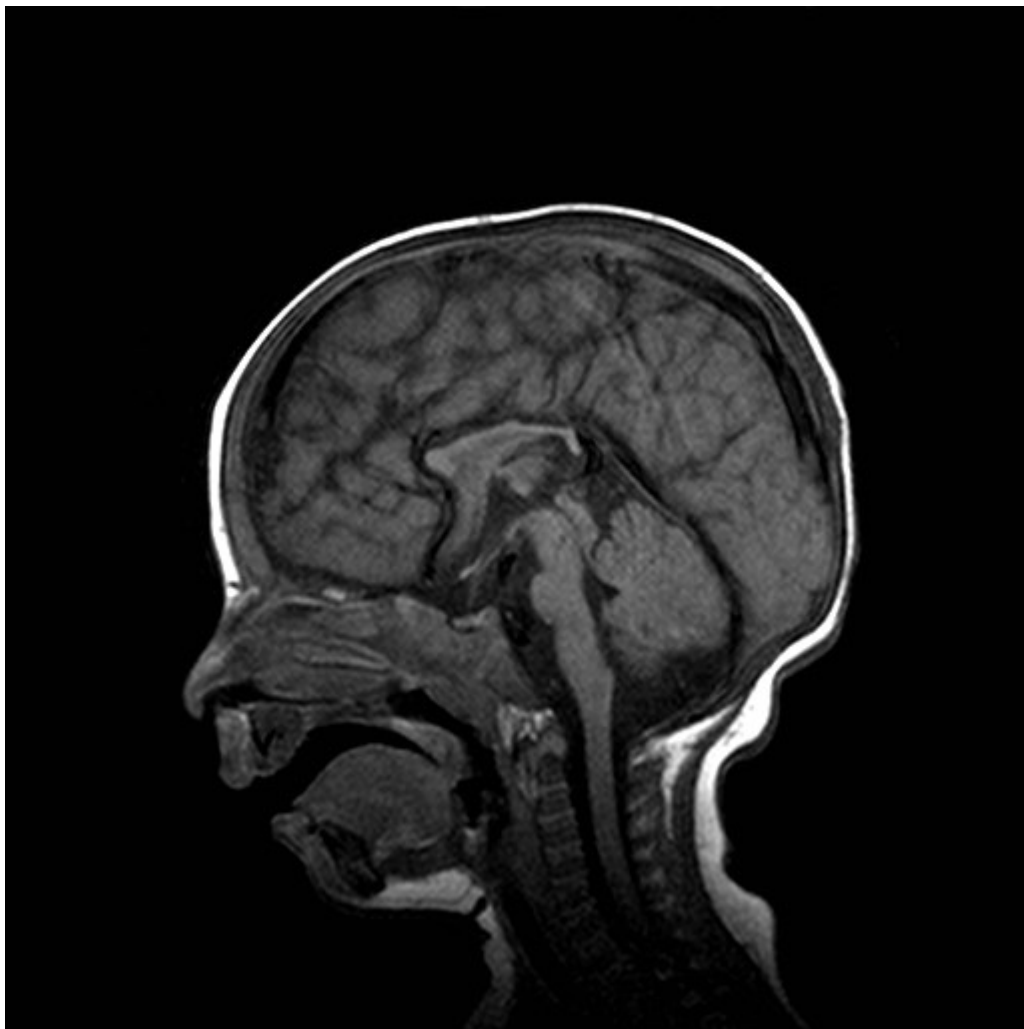

Sagittal image of the brain shows hypoplasia of the corpus callosum with loss of the gyral infolding of the cingulate gyri. There is an unusual thickened appearance to the lamina terminalis. Small pons and brainstem. Small mega cisterna magna.
